# Supplementary material for: Differential microstructural alterations in rat cerebral cortex in a model of chronic mild stress depression
Source: PLoS One. 2018 Feb 12;13(2):e0192329. doi: 10.1371/journal.pone.0192329 (PMC5809082; doi:10.1371/journal.pone.0192329)
Supplement: S1 File — (XLSX) [file pone.0192329.s003.xlsx]

## Sheet: Sheet1
			MC			SC			AC			VC
			ES	CI		ES	CI		ES	CI		ES	CI
	Axonal density (%)	Ctr	22.02	20.98	23.07	23.11	22.3	23.93	22	20.53	23.47	21.98	19.65	24.31
		Anh	21.58	19.99	23.17	23.8	22.65	24.96	22.62	20.67	24.56	21.32	18.3	24.35
		Res	23.82	22.22	25.42	22.49	21.24	23.75	22.01	19.93	24.1	23.68	20.45	26.91
			MC			SC			AC			VC
			ES	CI		ES	CI		ES	CI		ES	CI
	Dendritic density (%)	Ctr	22.5	21.43	23.56	22.85	22.0099	23.7078	22.68	21.23	24.13	21.9821	19.7105	24.2538
		Anh	21.58	19.84	23.32	23.45	22.2504	24.6515	22.27	20.33	24.22	21.0113	18.1877	23.8349
		Res	23.35	21.61	25.09	22.49	21.1052	23.8934	22.01	19.79	24.23	23.6867	20.5411	26.8322
			MC			SC			AC			VC
			ES	CI		ES	CI		ES	CI		ES	CI
	Cortical thickness (µm)	Ctr	2499	2251	2746	1989	1731	2247	1491	1331	1652	1325	1045	1606
		Anh	2020	1670	2370	1745	1381	2110	1586	1359	1814	1461	1064	1858
		Res	1857	1495	2195	1647	1283	2012	1403	1176	1631	1163	766	1560
		ES:Effect size
		CI: Confidence Interval
		MC: Motor cortex
		SC: Somatosensory cortex
		AC: Auditory cortex
		VC: Visual cortex
		Ctr: Control
		Anh: Anhedonic
		Res: Resileint
